# Supplementary material for: Differentiation therapy and the mechanisms that terminate cancer cell proliferation without harming normal cells
Source: PubMed Central journal article supplement (PMC6127320; doi:10.1038/s41419-018-0919-9), 2018-09-06

# Flow diagram

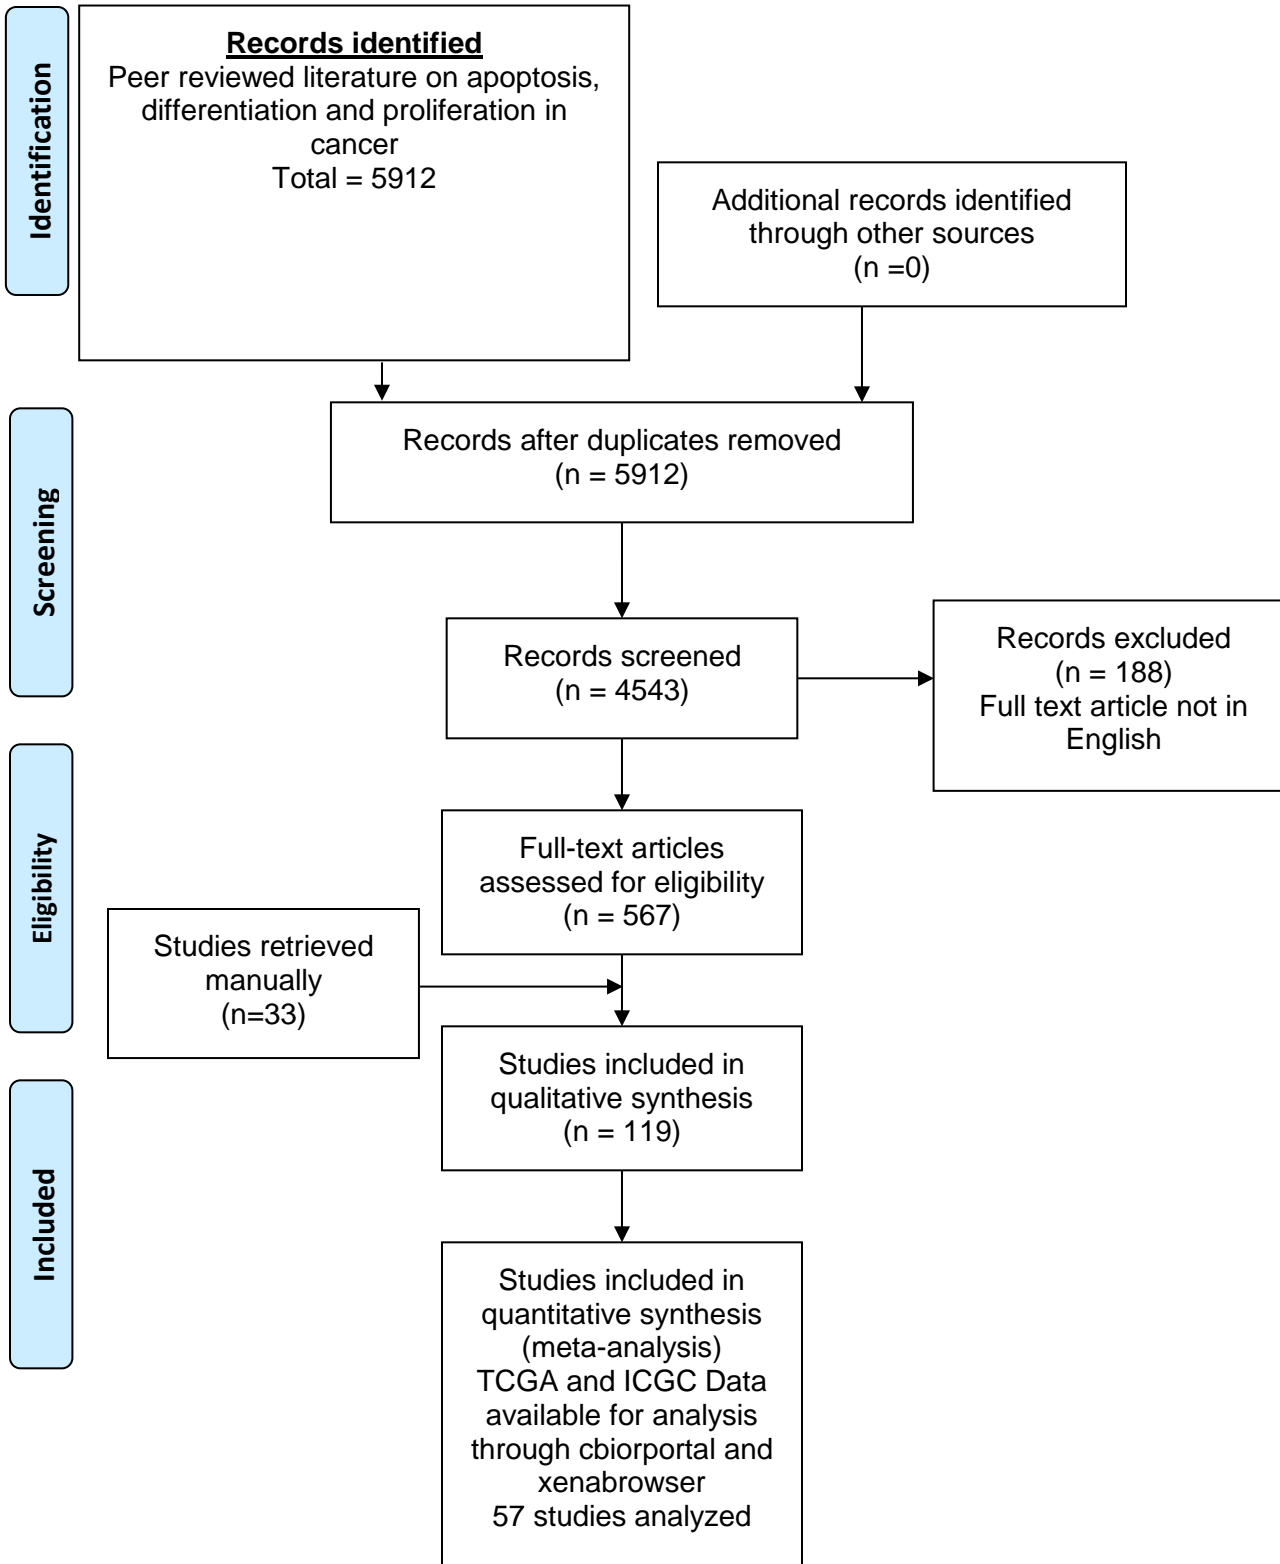

Supplement: 41419_2018_919_MOESM1_ESM.pdf [file 41419_2018_919_MOESM1_ESM.pdf]
